# Supplementary material
Source: PubMed Central journal article supplement (PMC5715468)

# Supporting Information

## **Palladium-mediated Synthesis of a Near-IR Fluorescent K<sup>+</sup> Sensor**

H. M. Dhammika Bandara<sup>†</sup>, Zhengmao Hua<sup>†</sup>, Mei Zhang<sup>†</sup>, Steven M. Pauff<sup>†§</sup>, Stephen C. Miller<sup>†</sup>, Elizabeth A. Colby Davie<sup>‡</sup> and William R. Kobertz<sup>\*†</sup>

<sup>†</sup>Department of Biochemistry and Molecular Pharmacology, Programs in Neuroscience and Chemical Biology, University of Massachusetts Medical School, 364 Plantation Street, Worcester, MA 01605, United States

<sup>‡</sup>Department of Natural Sciences, Assumption College, 500 Salisbury Street, Worcester MA 01609, United States

508.856.8861 (phone)

508.856.8867 (fax)

[william.kobertz@umassmed.edu](mailto:william.kobertz@umassmed.edu)

## Table of Contents

|                                                                                       |           |
|---------------------------------------------------------------------------------------|-----------|
| <b>Author Contact Info</b> .....                                                      | <b>S1</b> |
| <b>Table of Contents</b> .....                                                        | <b>S2</b> |
| <b>pH response of <math>K_{NIR-1}</math></b> .....                                    | <b>S3</b> |
| <b>Figure S1: KNIR-1 pH sensitivity</b> .....                                         | <b>S3</b> |
| <b>Quantum yield calculation of <math>K_{NIR-1}</math></b> .....                      | <b>S4</b> |
| <b>Cell culture and transient transfection</b> .....                                  | <b>S5</b> |
| <b>Figure S2: Full synthetic route of <math>K_{NIR-1}</math></b> .....                | <b>S6</b> |
| <b>Figure S3: Full syntheses of precursors for palladium coupling reactions</b> ..... | <b>S7</b> |
| <b>NMR spectra</b> .....                                                              | <b>S8</b> |

**Effect of pH on the fluorescence response of  $K_{NIR-1}$ .** A 15  $\mu$ L aliquot of a 2.8 mM  $K_{NIR-1}$  stock solution was transferred to a quartz cuvette containing 3.0 mL of HEPES buffer solution to obtain a 14  $\mu$ M  $K_{NIR-1}$  solution (0.5% vehicle concentration), and its fluorescence was recorded. A 30  $\mu$ L aliquot of a 0.50 M KCl stock solution was added to above solution to obtain a 5.0mM  $K^+$  solution. The pH of the above solution was increased to 7.8 by adding 0.1 M NaOH (aq). The pH of the above solution was then adjusted to 7.0, 6.8 and 6.0 by adding 0.1 M HCl (aq). Fluorescence intensity of the solution was measured at each pH.

**Figure S1.** Effect of pH on fluorescence emission of  $K_{NIR-1}$  (10 mM HEPES, 5 mM  $K^+$ ). The pH was adjusted by adding either 0.1 M HCl or 0.1 M NaOH.

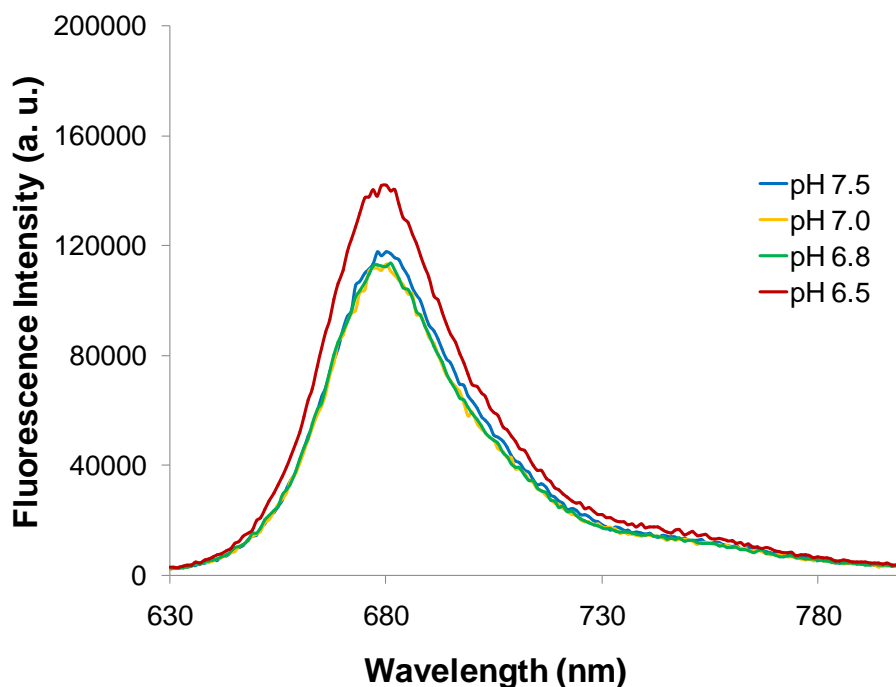

**Quantum yield of  $\mathbf{K}_{\text{NIR-1}}$ .** The fluorescence quantum yield ( $\Phi_f^i$ ) was calculated according to equation 1, using the absorption factor  $f_x(\lambda_{ex})$  and the integrated fluorescence response  $F^x(\lambda_{em})$  of both sample ( $x = i$ ) and standard ( $x = s$ ). The refractive index of solvent for sample was assumed to be equal to that of standard ( $n_i = n_s$ ). The absorption factor  $f_x(\lambda_{ex})$  was calculated using equation 2 where  $A_x(\lambda_{ex})$  is the absorbance of sample ( $x = i$ ) and standard ( $x = s$ ) at the excitation wavelength.

$$\Phi_f^i = \Phi_f^s \frac{f_s(\lambda_{ex}) \int \lambda_{em} F^i(\lambda_{em}) n_i^2}{f_i(\lambda_{ex}) \int \lambda_{em} F^s(\lambda_{em}) n_s^2} \quad (1)$$

$$f_x(\lambda_{ex}) = 1 - 10^{-A_x(\lambda_{ex})} \quad (2)$$

A 9.3 mM stock solution of the fluorescence reference standard was prepared by dissolving 1.2 mg of oxazine-170 in 300  $\mu\text{L}$  of acetonitrile. The absorbance and fluorescence emission (630 – 800 nm; 620 nm excitation) of a 14  $\mu\text{M}$  oxazine-170 solution in 10 mM HEPES pH7.4 in the presence (200 mM) and absence (0 mM) of  $\text{K}^+$ . The quantum yields for  $\mathbf{K}_{\text{NIR-1}}$  for apo:  $\Phi = 0.0597 \pm 0.0003$  and  $\text{K}^+$  bound:  $\Phi = 0.289 \pm 0.005$  were determined from three experiments  $\pm$  SEM. The vehicle (acetonitrile) concentration was 0.5% for all measurements.

**Cell culture and DNA transfections:** Chinese Hamster Ovary (CHO-K1) cells were cultured in F-12K nutrient mixture (Gibco – Invitrogen). All media was supplemented with 10% fetal bovine serum (Hyclone) and 102 U/mL penicillin/streptomycin (Gibco – Invitrogen). Cells were plated at 60-75% confluency in 35 mm dishes. After 24 h, cells were transiently transfected at RT with 1  $\mu$ g of either empty plasmid DNA (pCDNA) or Shaker-IR DNA with 5  $\mu$ L Lipofectamine (Invitrogen). Voltage-clamp fluorometry was performed 24 h post-transfection.

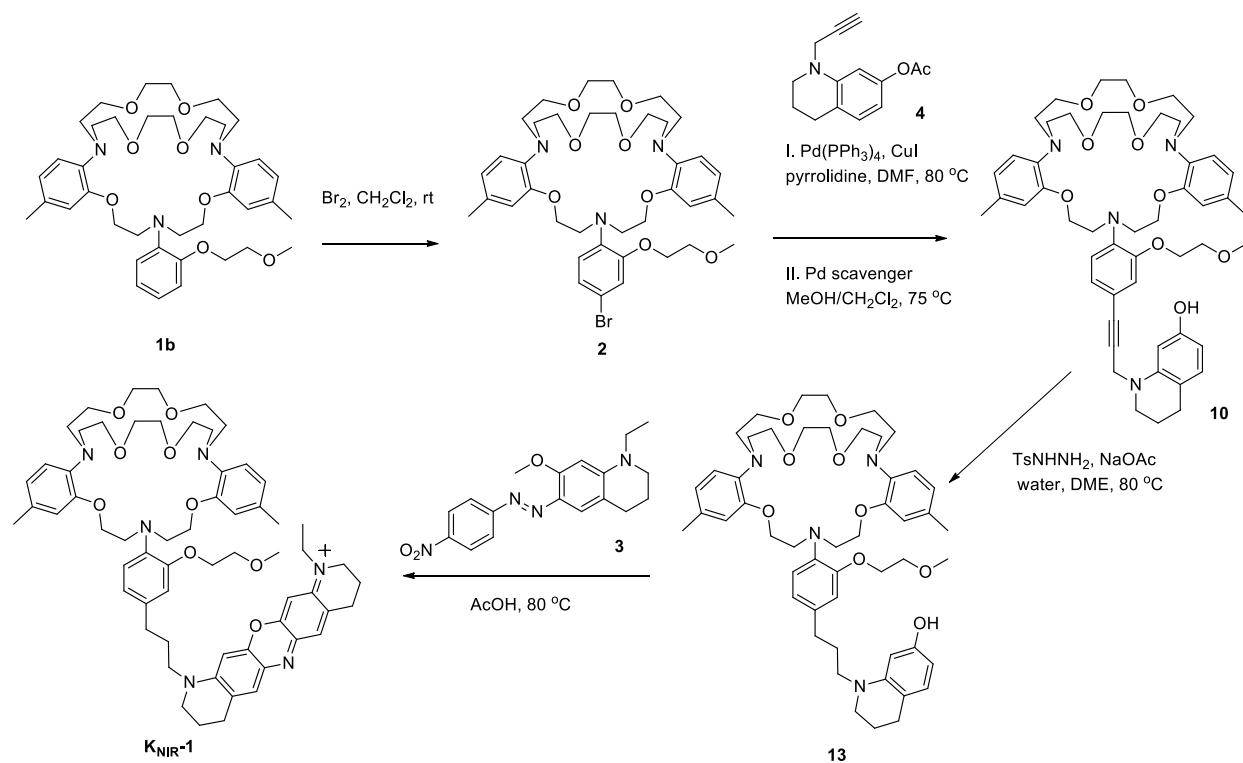

**Figure S2.** Synthesis of near-IR fluorescent  $K^+$  sensor,  $K_{NIR-1}$

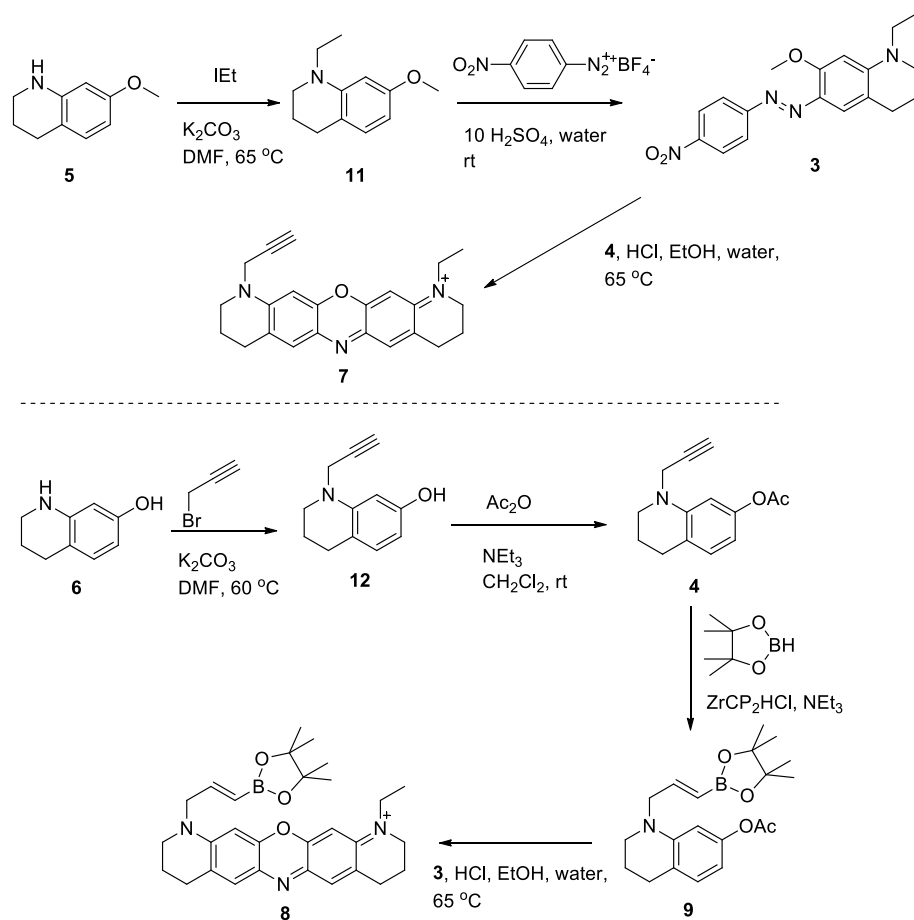

**Figure S3.** Synthesis of oxazine dyes and precursors for palladium-based coupling reactions

# NMR spectra

<sup>1</sup>H NMR of compound **2** in CDCl<sub>3</sub>

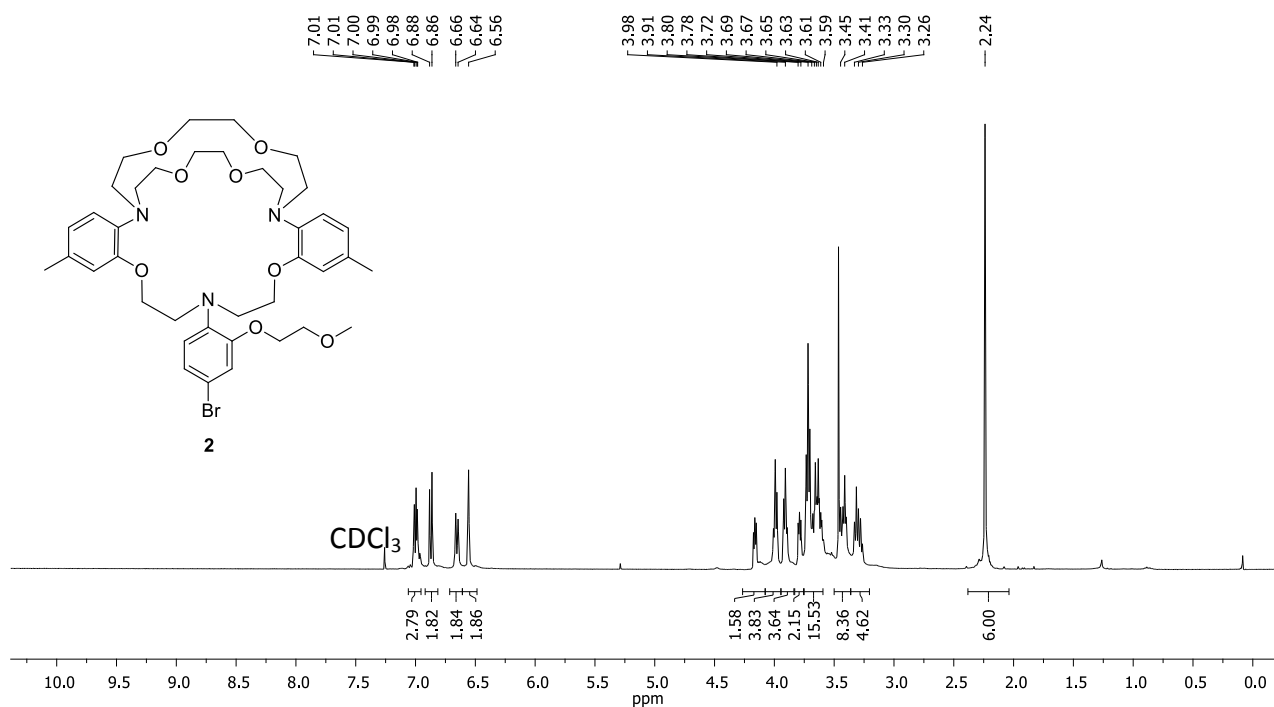

<sup>13</sup>C NMR of compound **2** in CDCl<sub>3</sub>

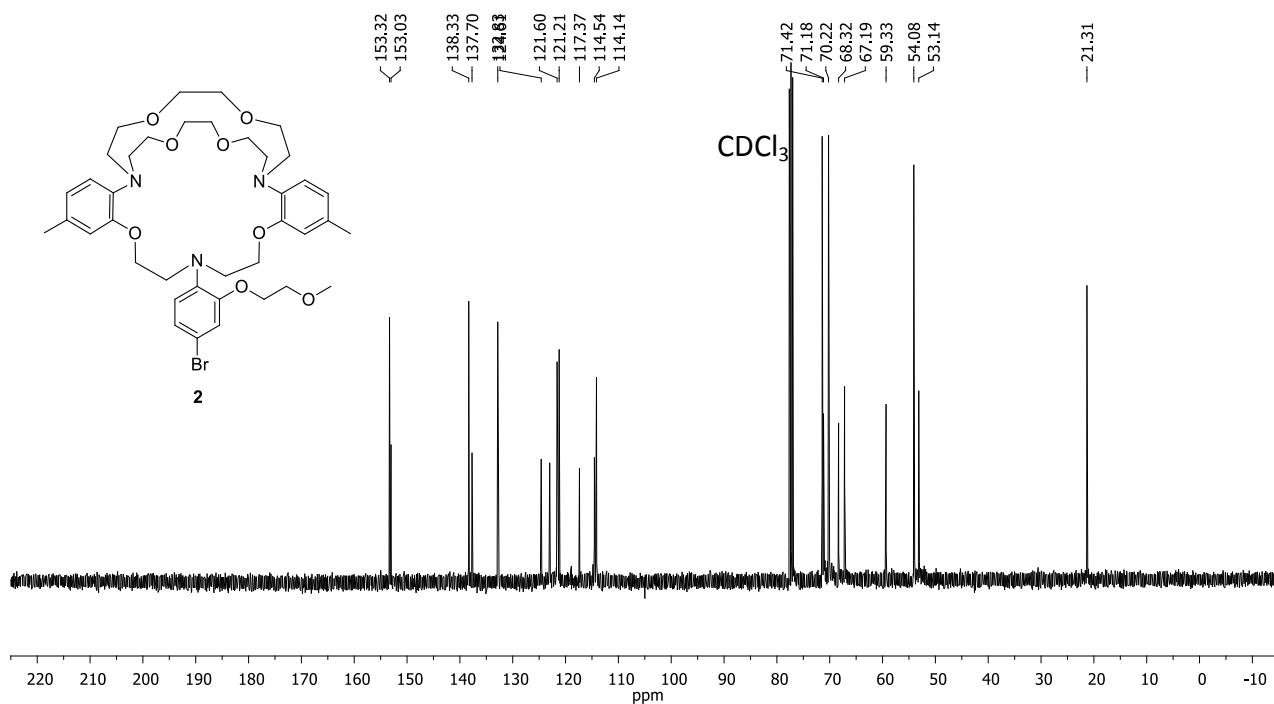



<sup>1</sup>H NMR of compound **3** in CDCl<sub>3</sub>

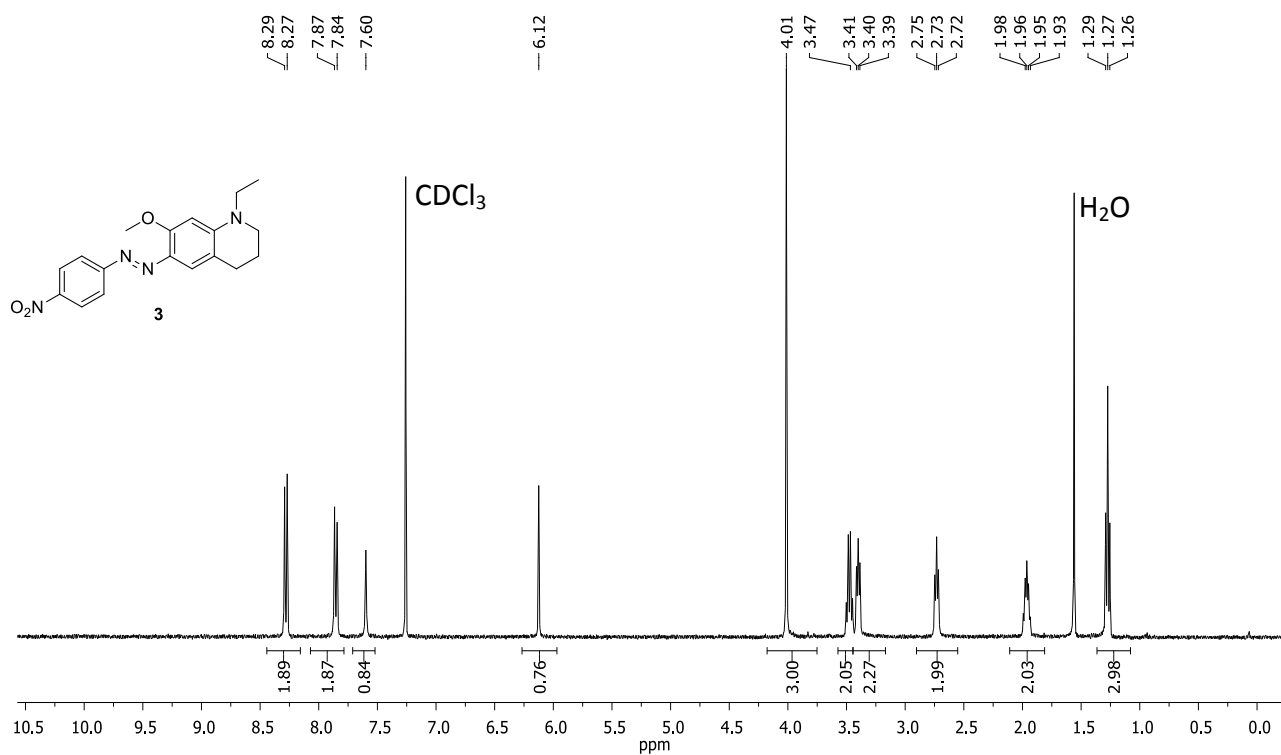

<sup>13</sup>C NMR of compound **3** in CDCl<sub>3</sub>

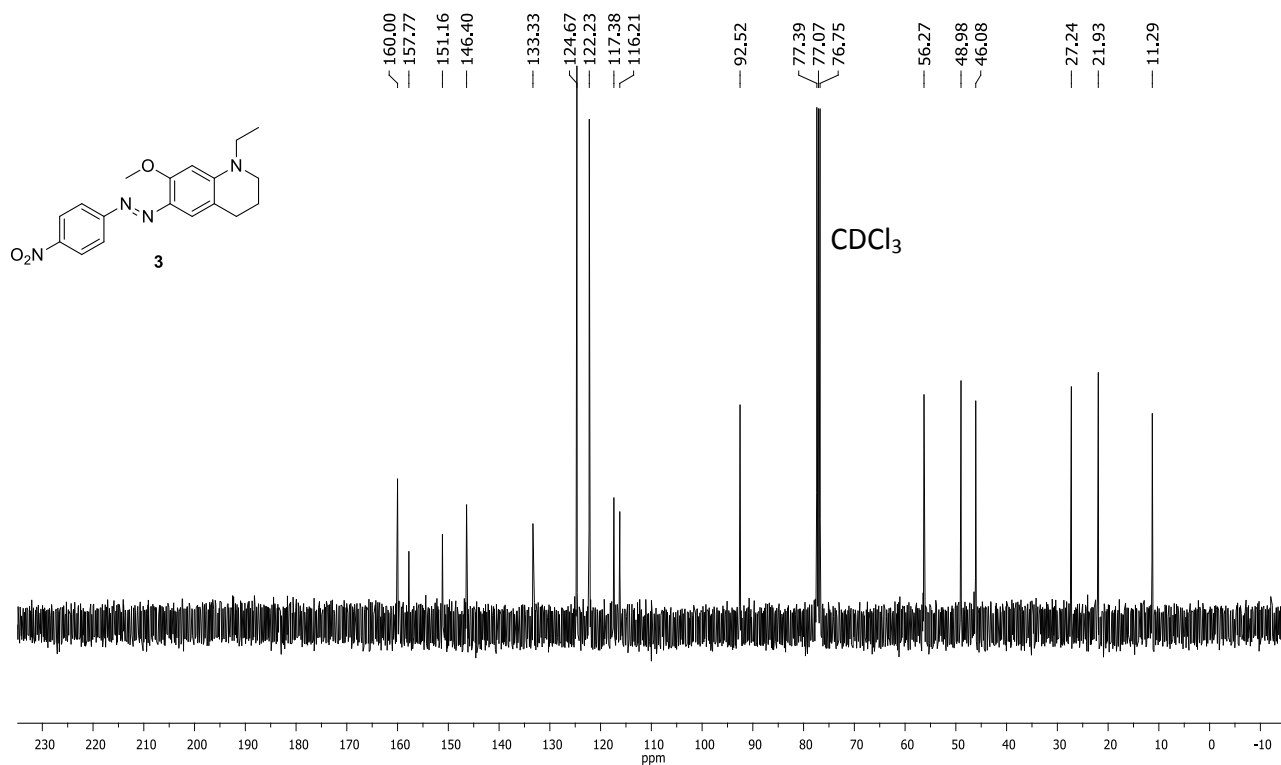

<sup>1</sup>H NMR compound **4** in CDCl<sub>3</sub>

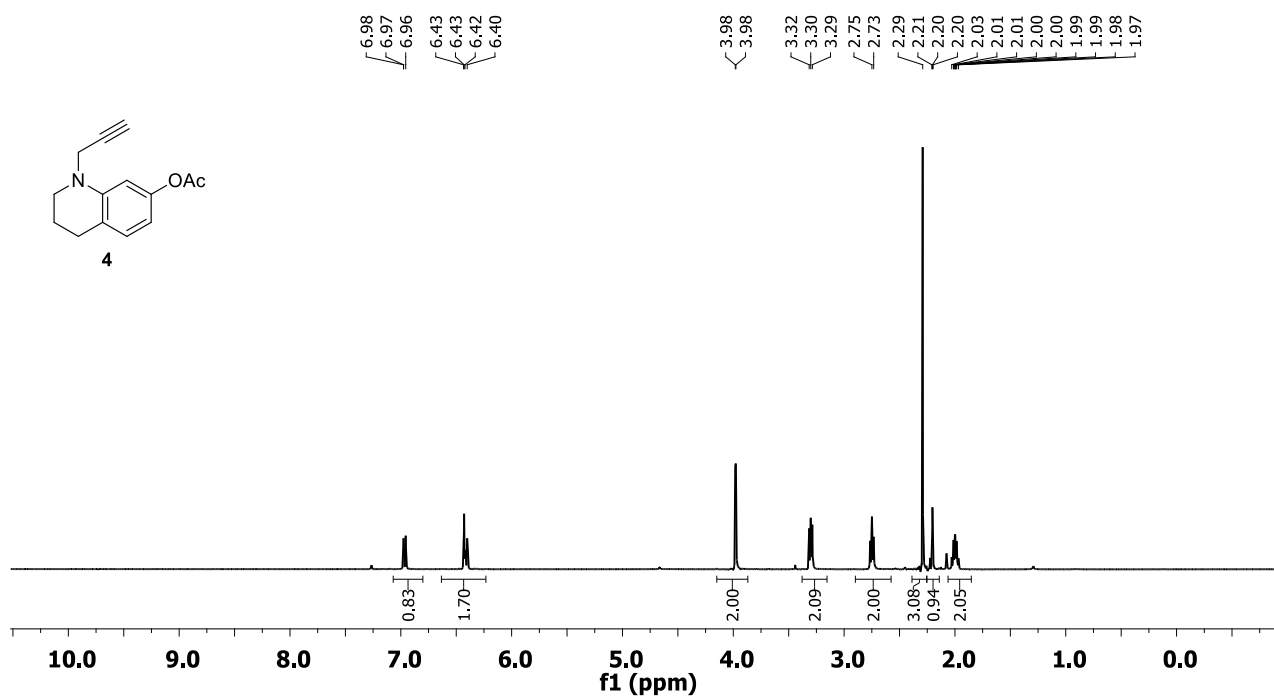

<sup>13</sup>C NMR of compound **4** in CDCl<sub>3</sub>

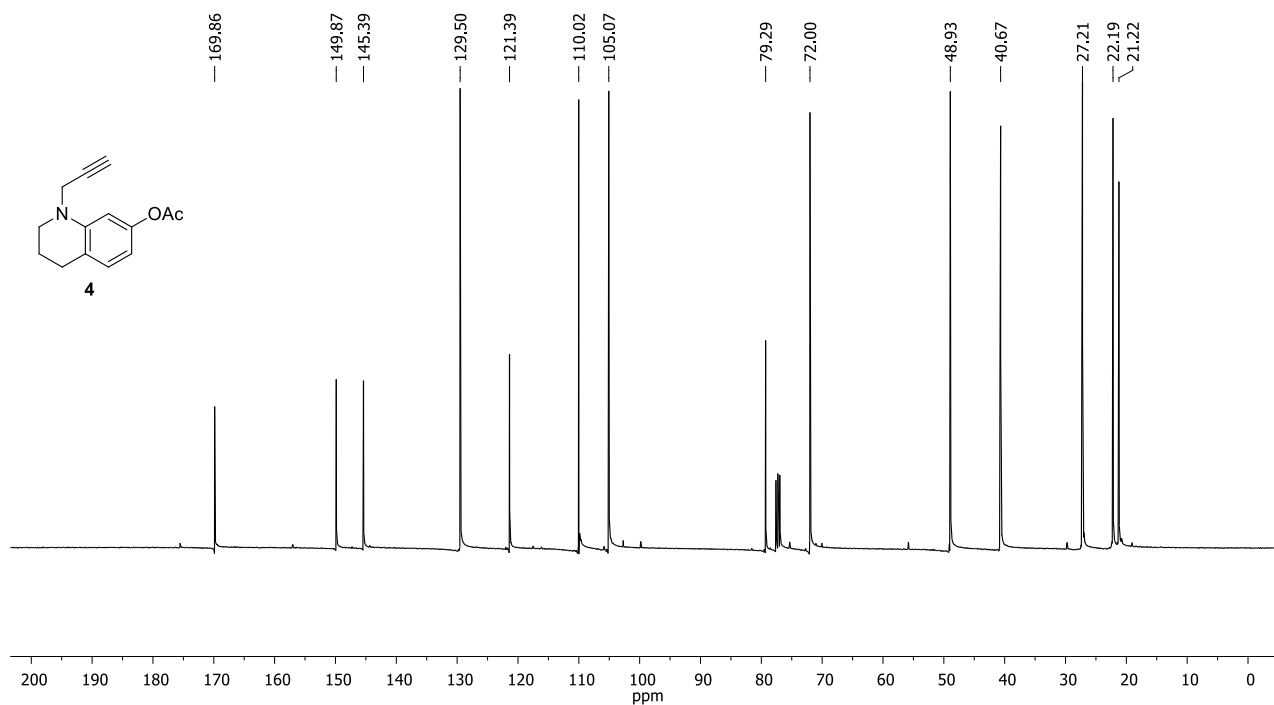

<sup>1</sup>H NMR of compound **7** chloride in CDCl<sub>3</sub>

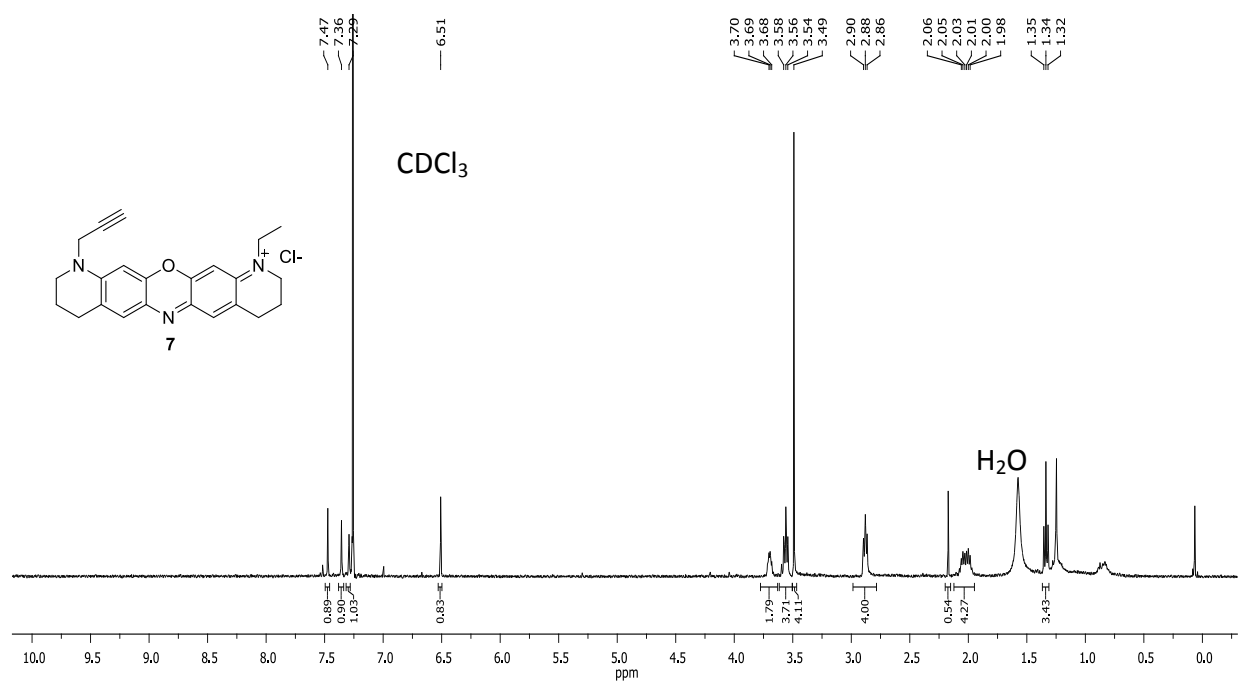

<sup>13</sup>C NMR of compound **7** chloride in CD<sub>3</sub>OD

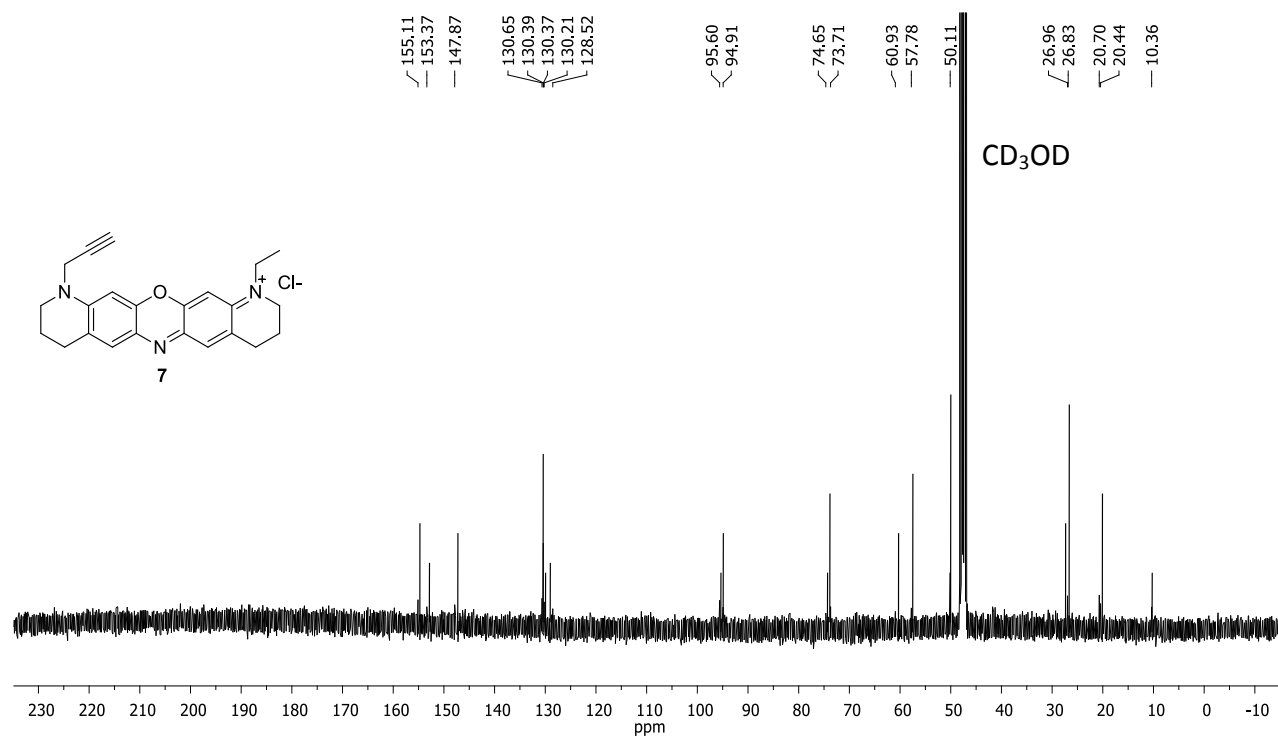

<sup>1</sup>H NMR of compound **8** in CDCl<sub>3</sub>

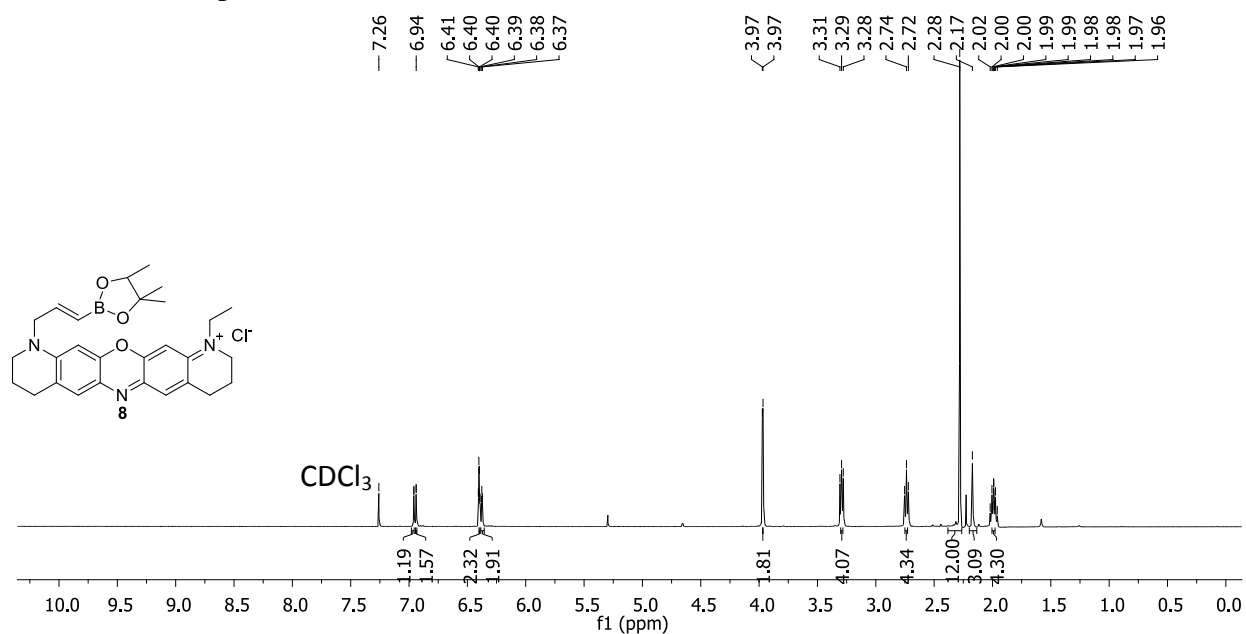

<sup>13</sup>C NMR of compound **8** in CD<sub>3</sub>OD

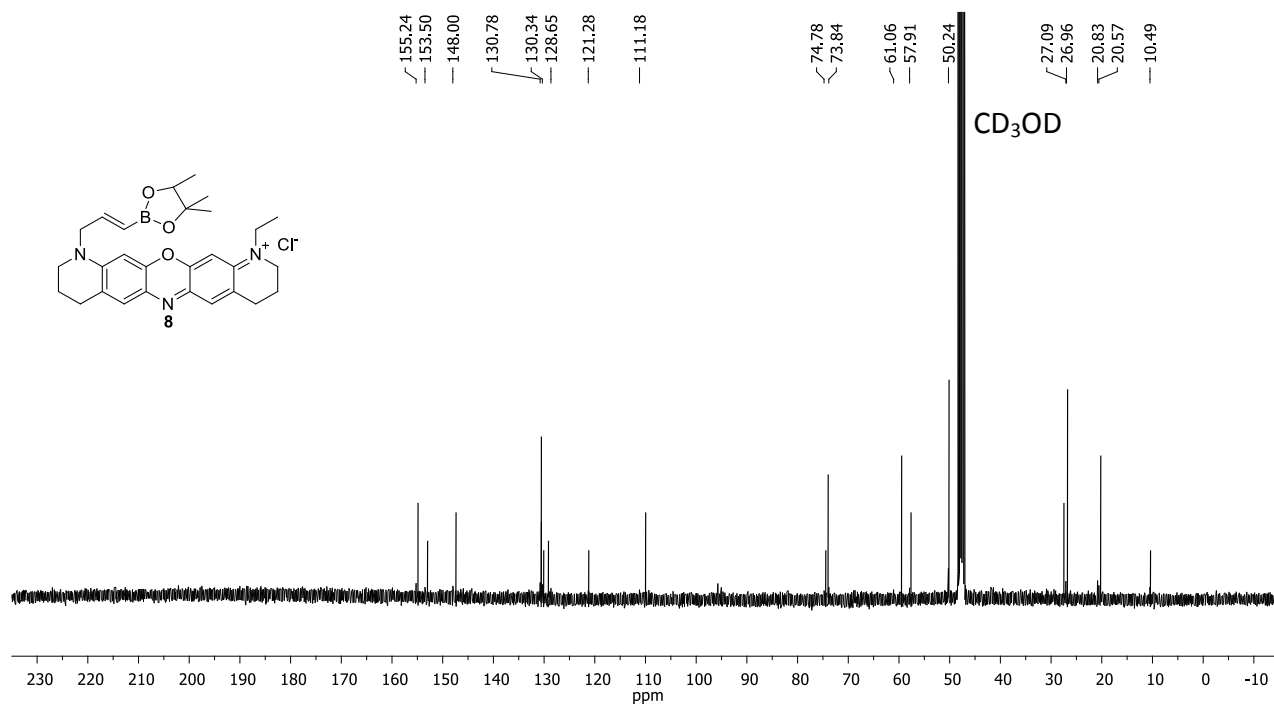

<sup>1</sup>H NMR of compound **9** in MeOD

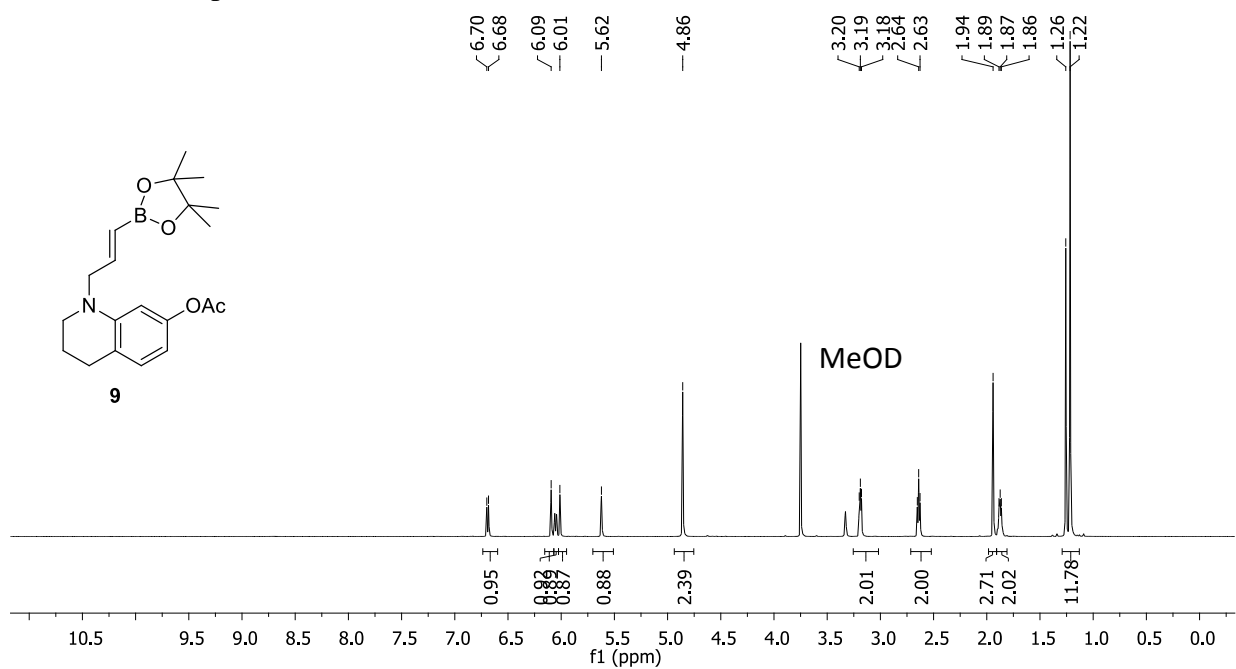

<sup>13</sup>C NMR of compound **9** in MeOD

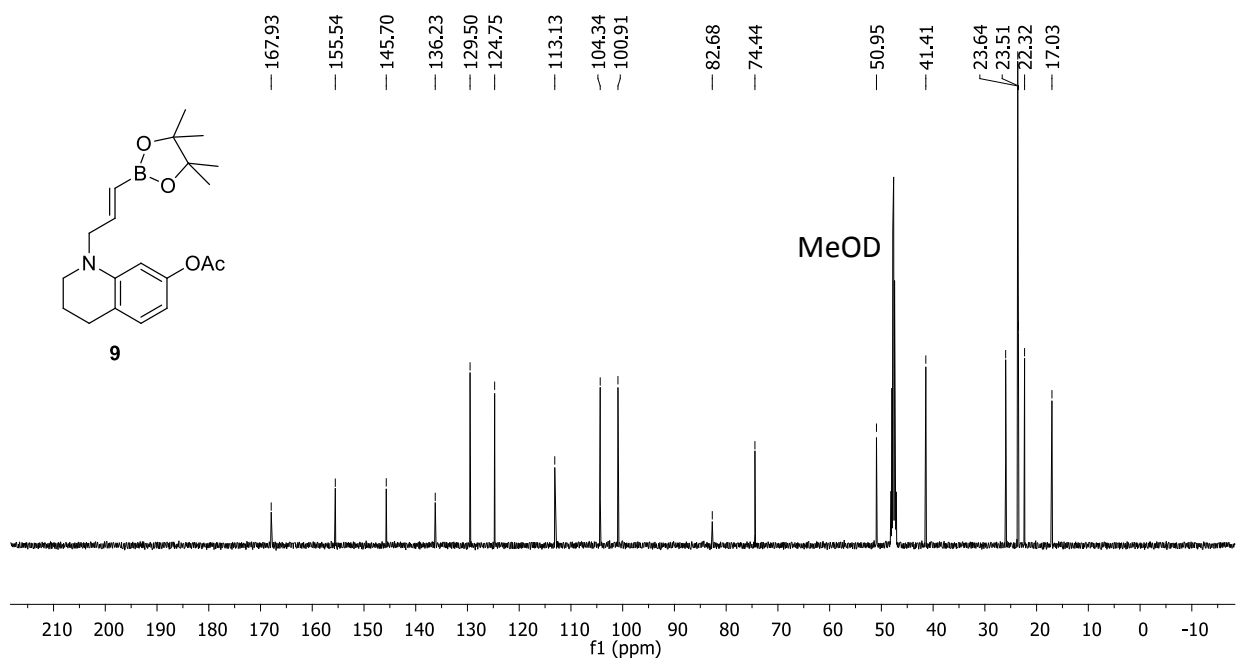

<sup>1</sup>H NMR of compound **10** in CDCl<sub>3</sub>

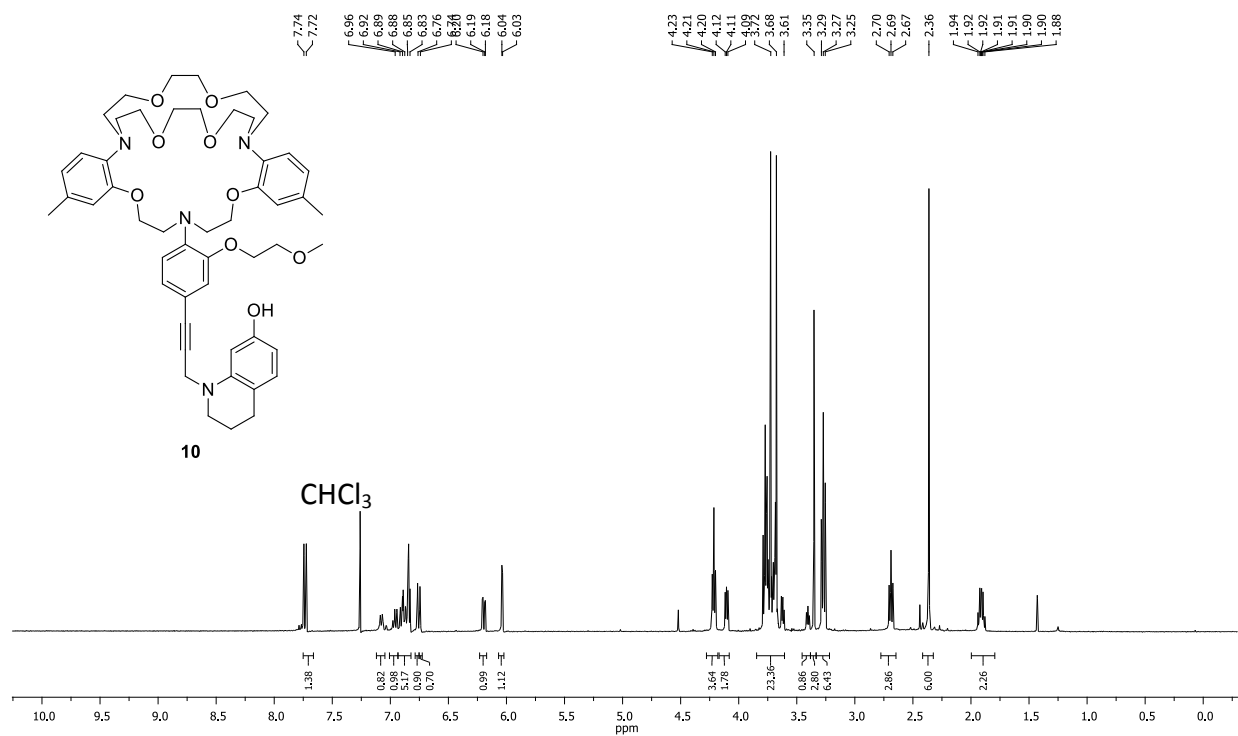

<sup>13</sup>C NMR of compound **10** in CDCl<sub>3</sub>

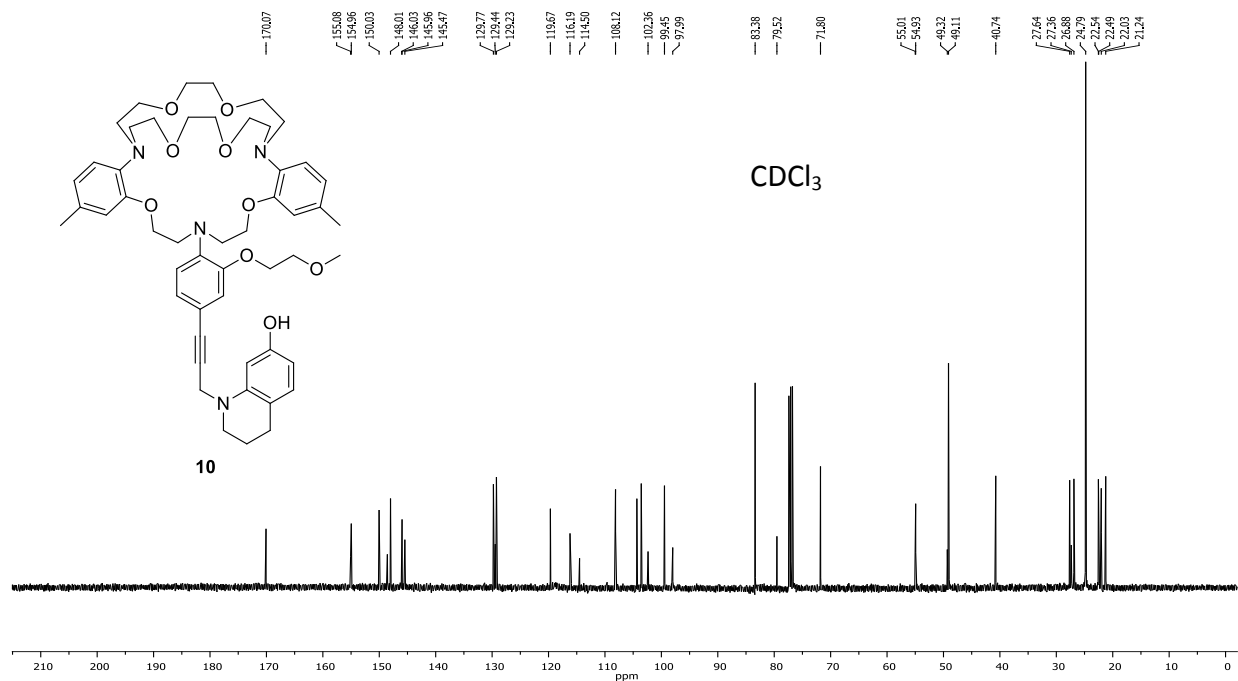

$^1\text{H}$  NMR of compound **11** in  $\text{CDCl}_3$

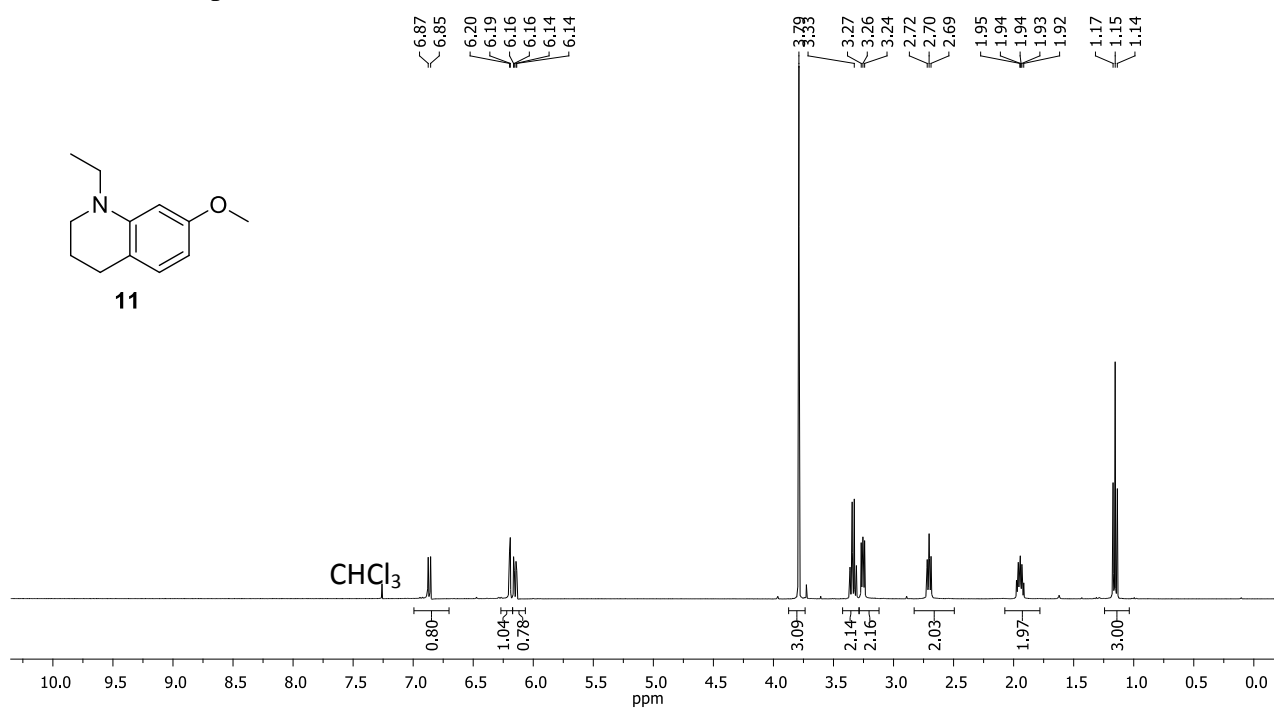

$^{13}\text{C}$  NMR of compound **11** in  $\text{CDCl}_3$

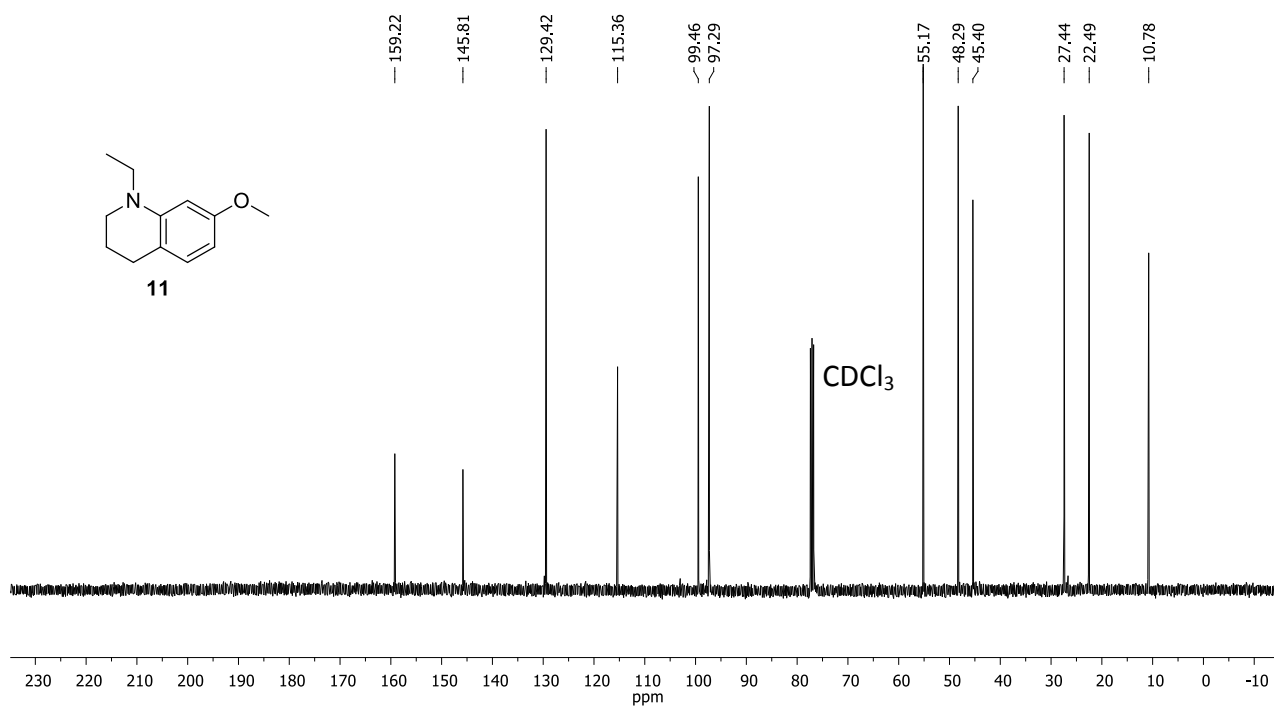

<sup>1</sup>H NMR of compound **12** in CDCl<sub>3</sub>

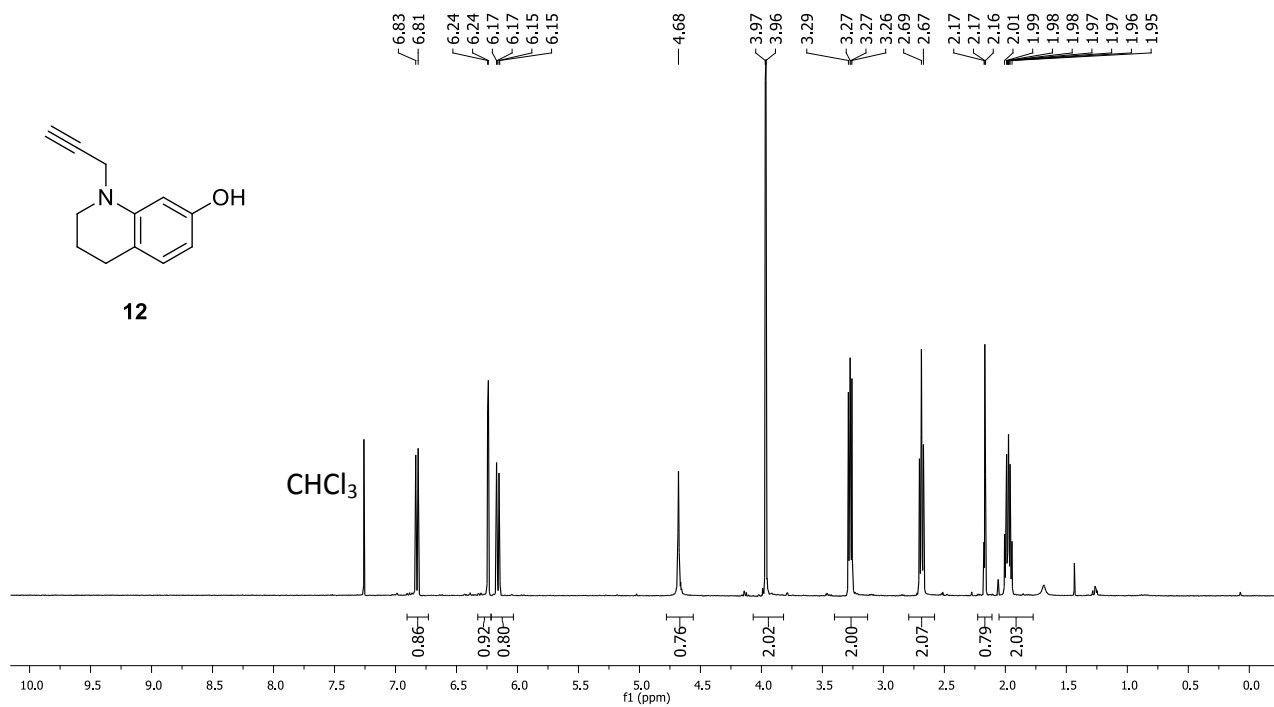

<sup>13</sup>C NMR of compound **12** in CDCl<sub>3</sub>

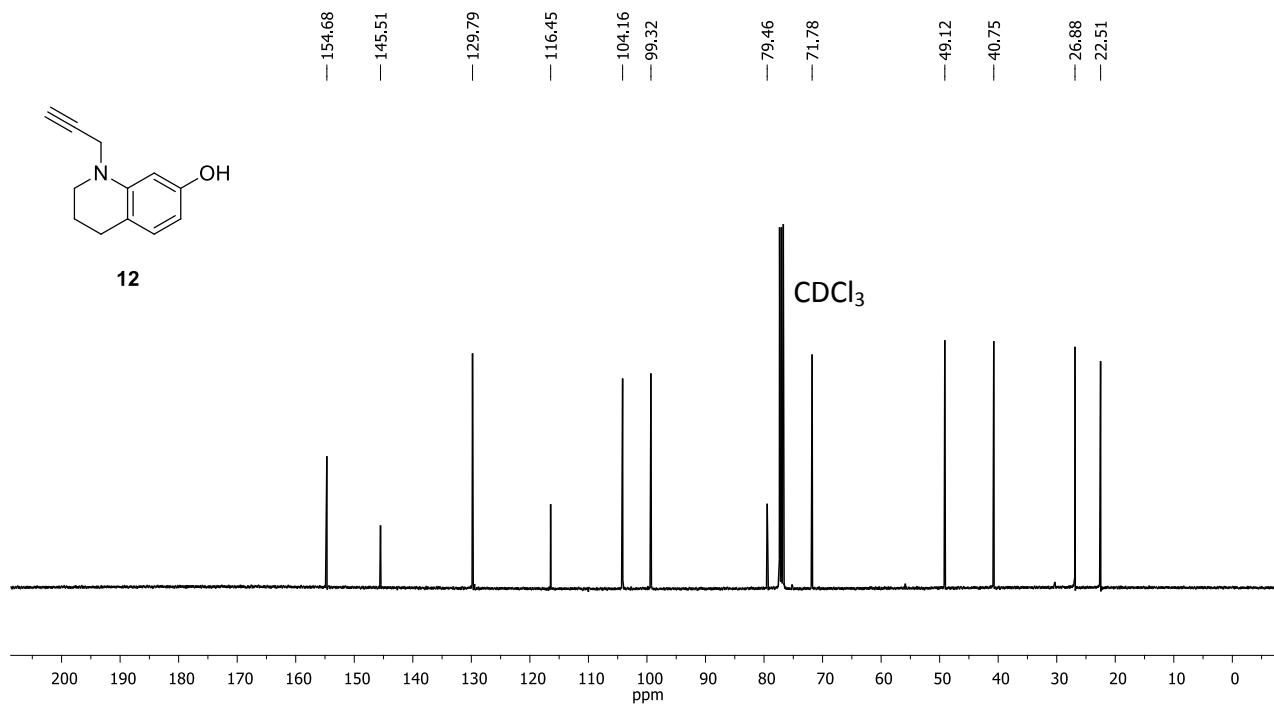



<sup>1</sup>H NMR of compound **13** in CDCl<sub>3</sub>

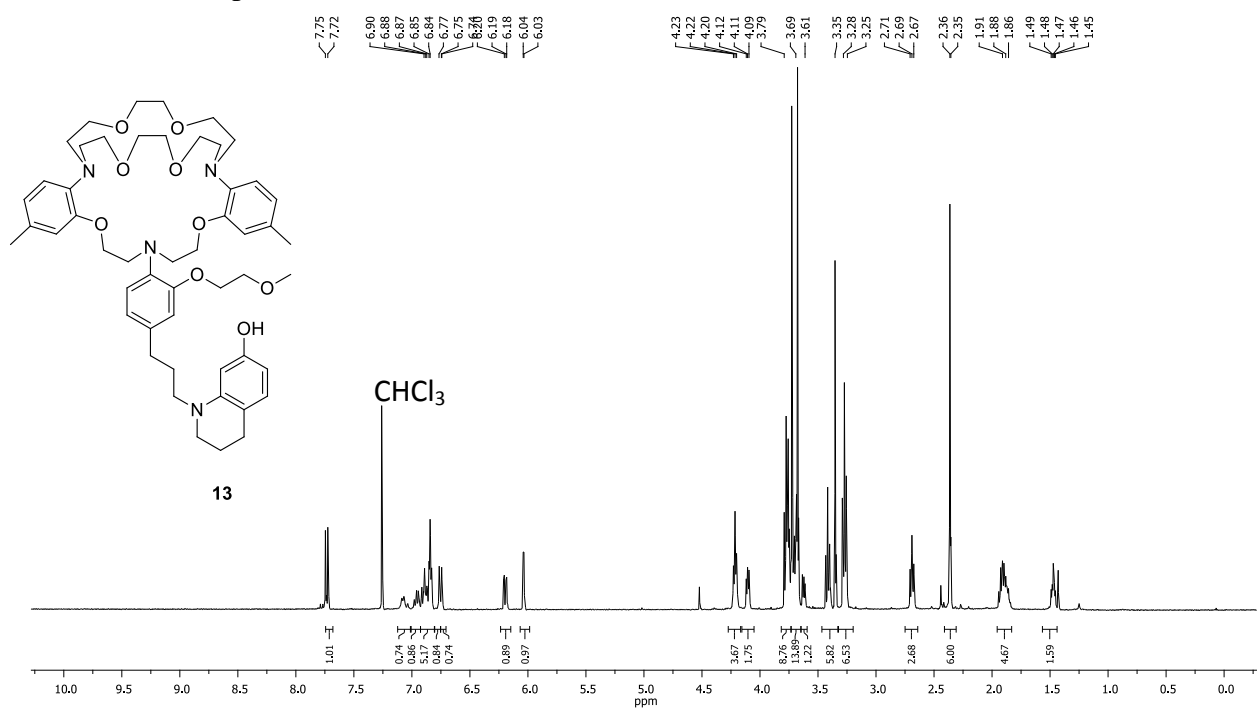

<sup>13</sup>C NMR of compound **13** in CDCl<sub>3</sub>

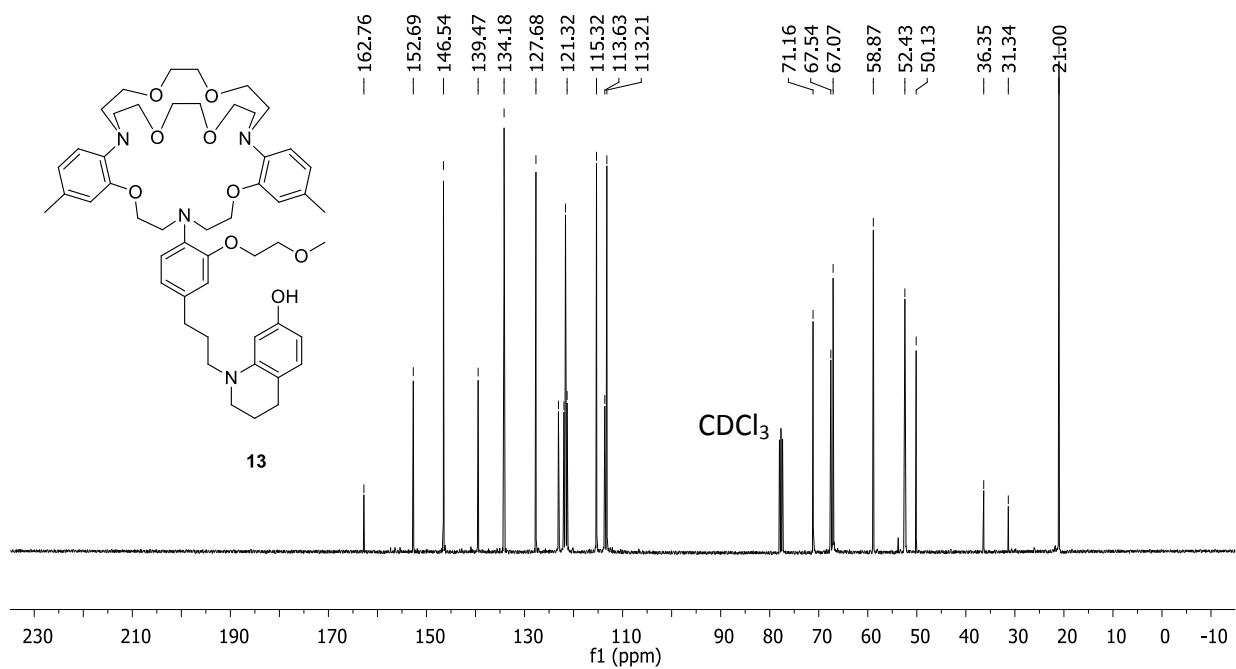

$^1\text{H}$  NMR of **K<sub>NIR</sub>-1acetate** in  $\text{CD}_3\text{OD}$

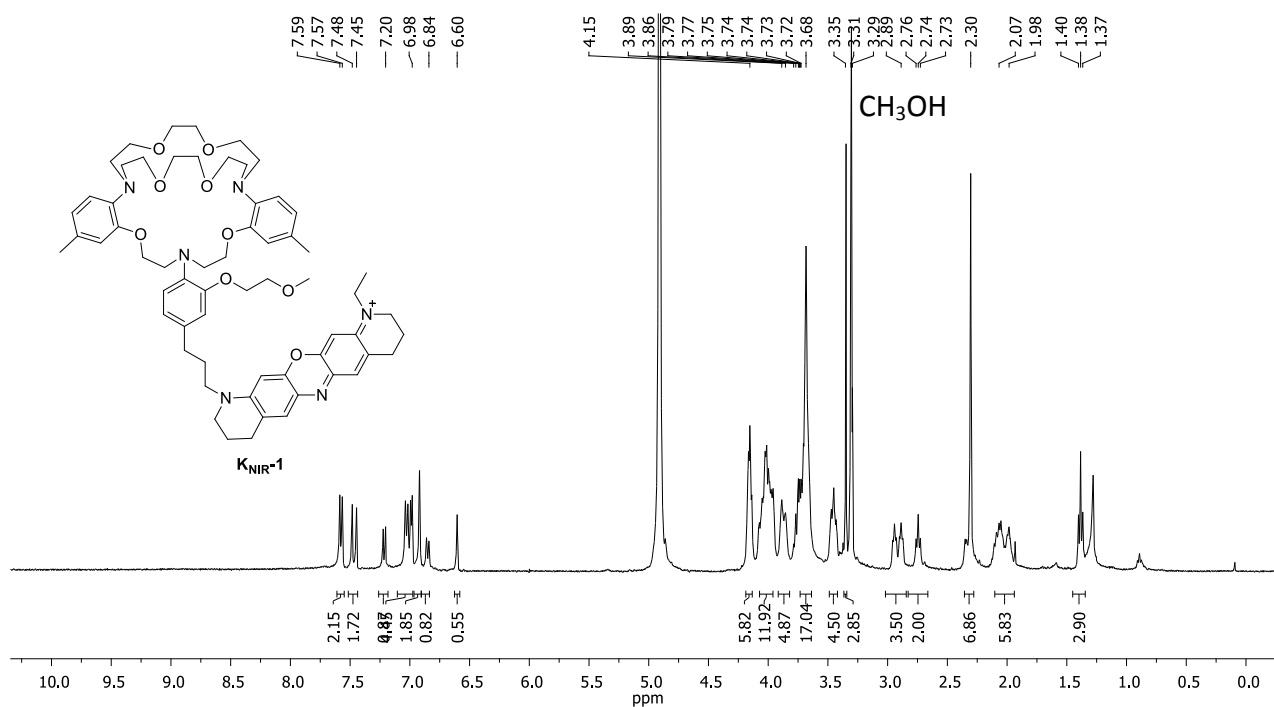

$^{13}\text{C}$  NMR of **K<sub>NIR</sub>-1acetate** in  $\text{DMSO-d}_6$

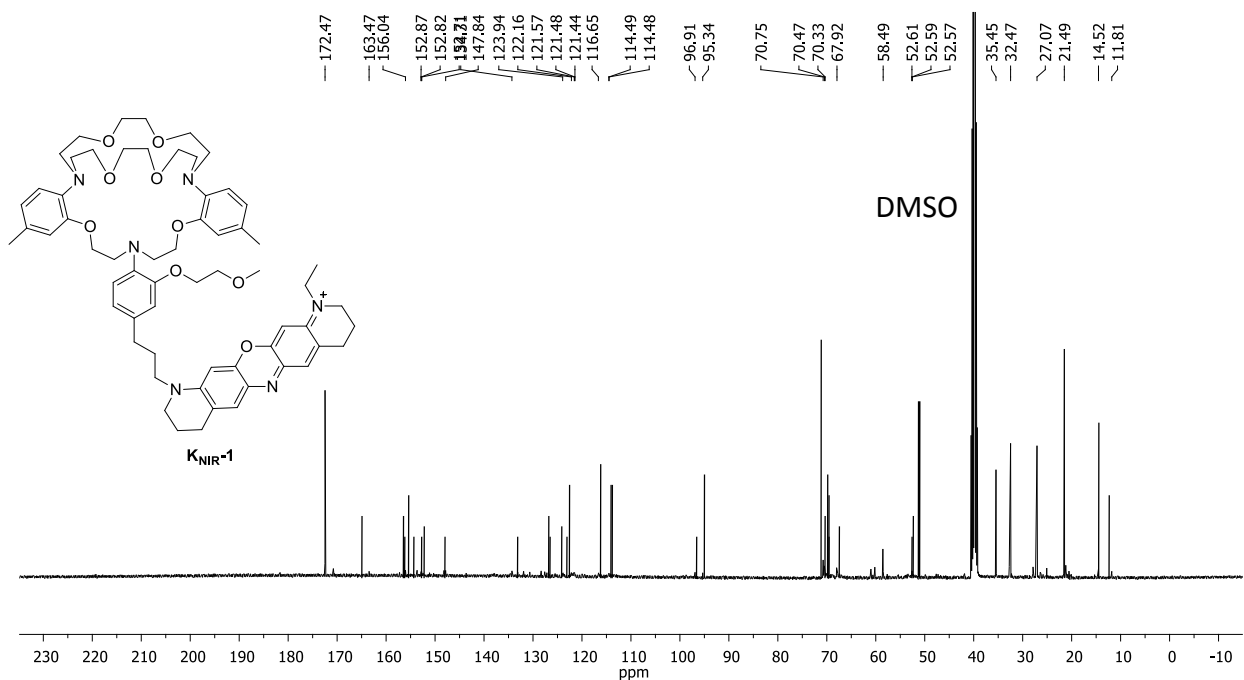

Supplement: NIHMS922963-supplement-SI.pdf [file NIHMS922963-supplement-SI.pdf]
